# Supplementary material for: A phase 1/2 trial of an immune-modulatory vaccine against IDO/PD-L1 in combination with nivolumab in metastatic melanoma
Source: PubMed Central journal article supplement (PMC8904254; doi:10.1038/s41591-021-01544-x), 2021-12-09
Supplement: 41591_2021_1544_MOESM1_ESM.pdf [file 41591_2021_1544_MOESM1_ESM.pdf]

---

**Supplementary information**

---

**A phase 1/2 trial of an immune-modulatory vaccine against IDO/PD-L1 in combination with nivolumab in metastatic melanoma**

---

In the format provided by the authors and unedited

# Supplementary figure 1

## Consort Diagram

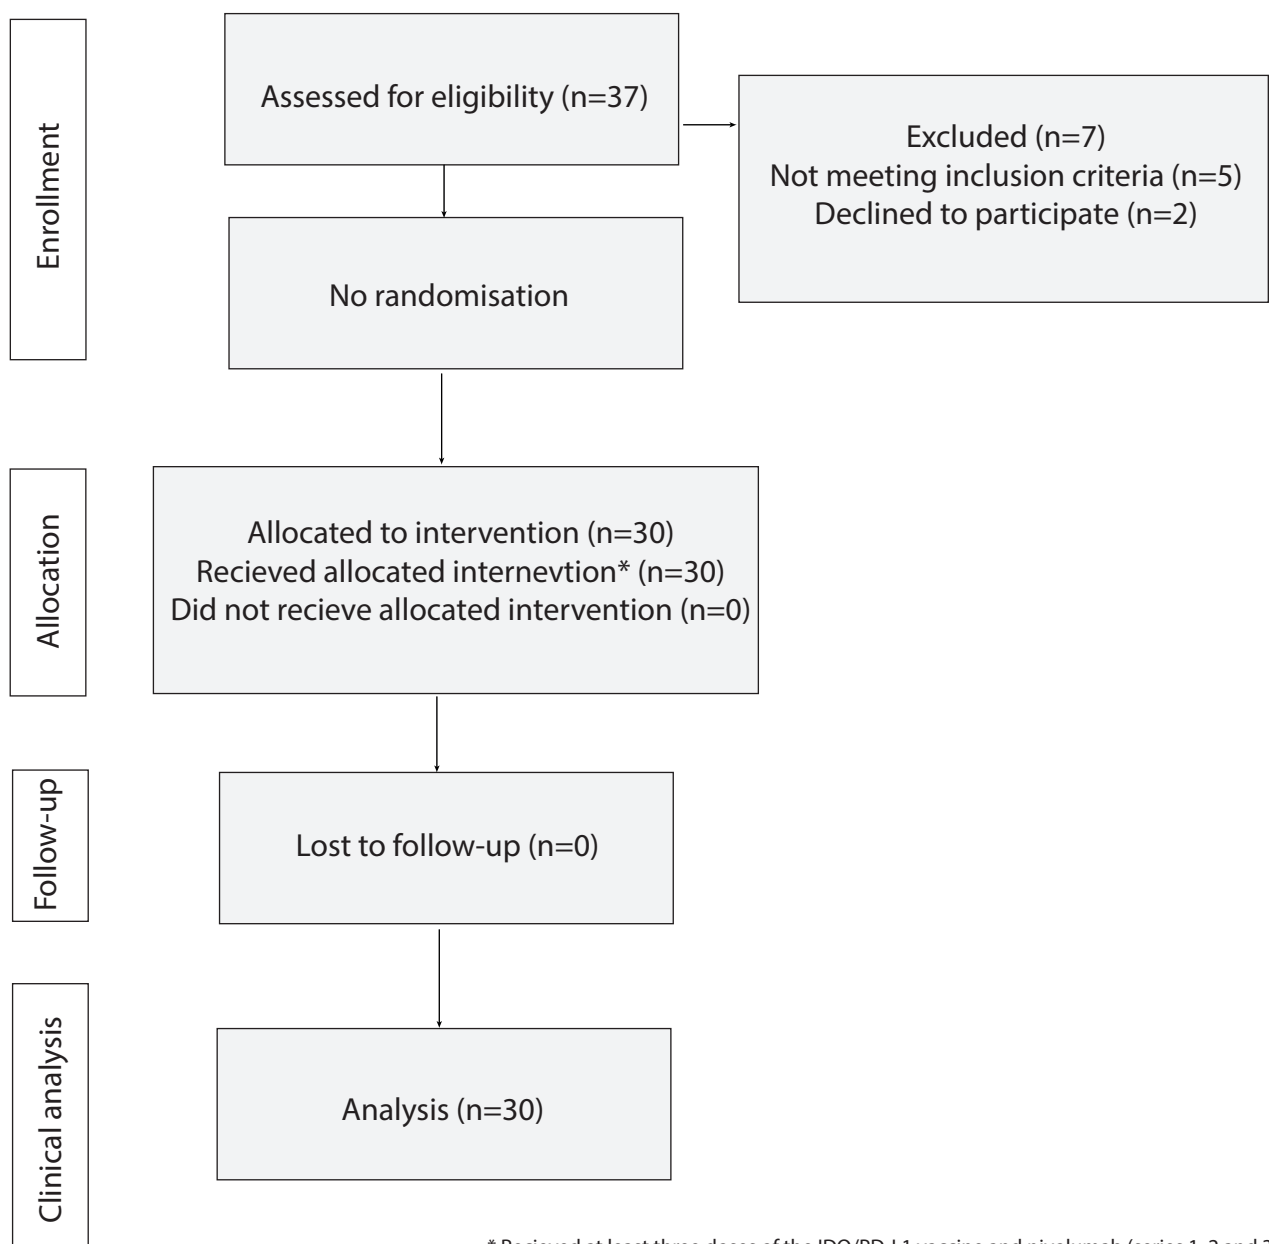

**Supplementary figure 1. Consort diagram.** A total of 37 patients with metastatic melanoma were consented to the study. A total of 30 patients were enrolled and all 30 patients received allocated study treatment.

## Supplementary figure 2

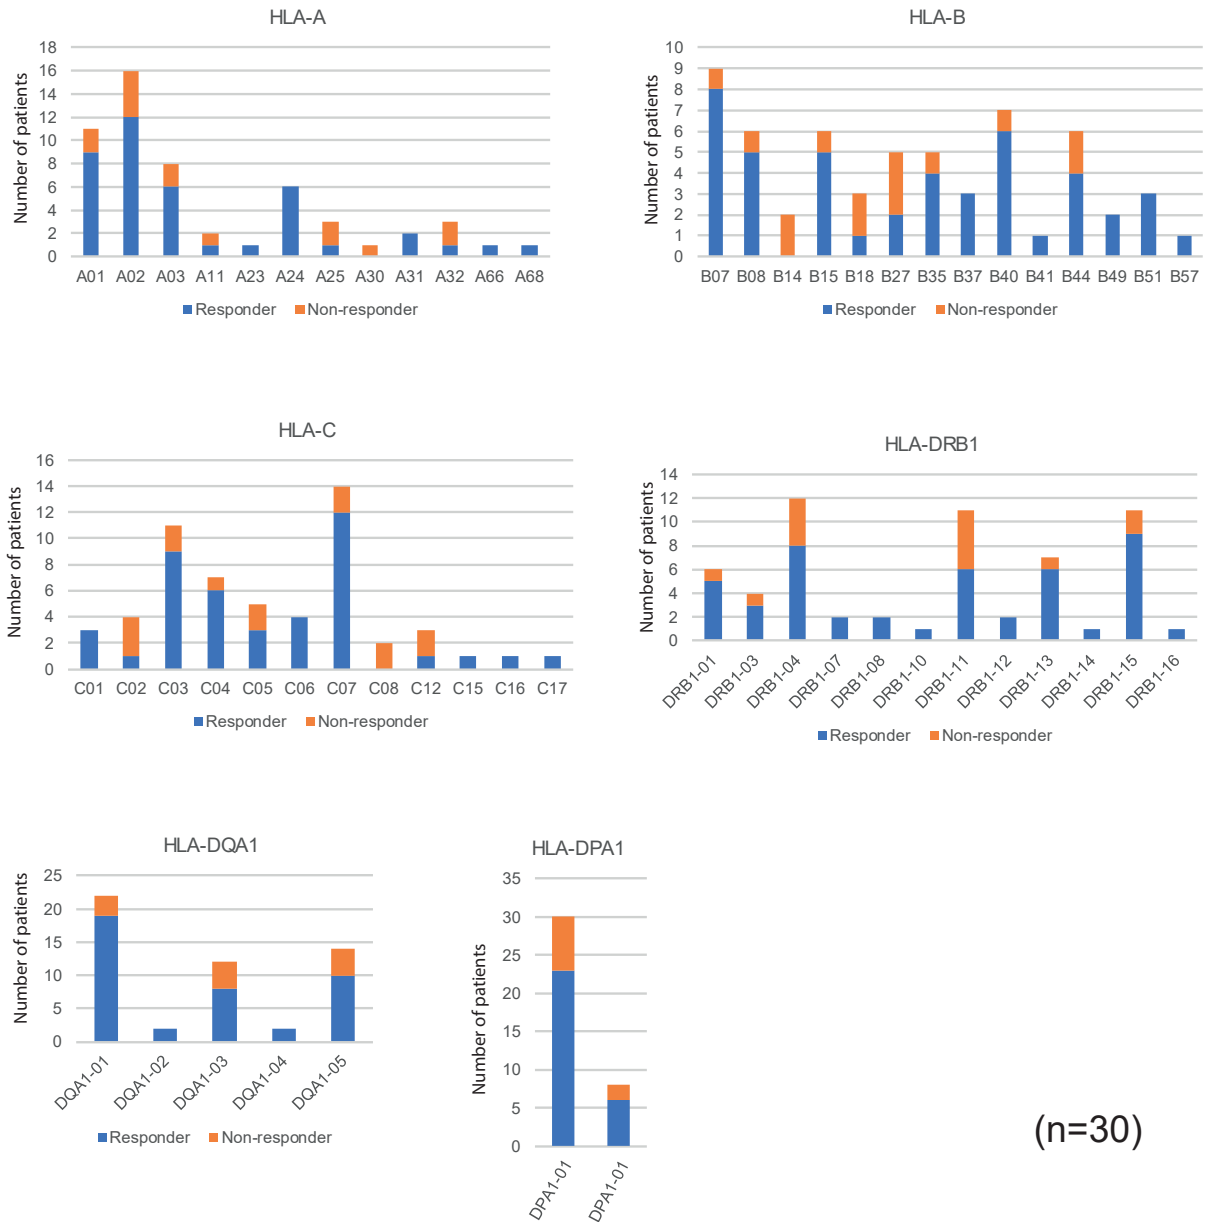

(n=30)

**Supplementary figure 2. HLA genotypes and clinical response.** Bar plots indicating HLA-genotype and clinical response. Blue bars represent responders (CR+PR) and orange bars represent non-responders (PD) (n=30).

Supplementary figure 3

a

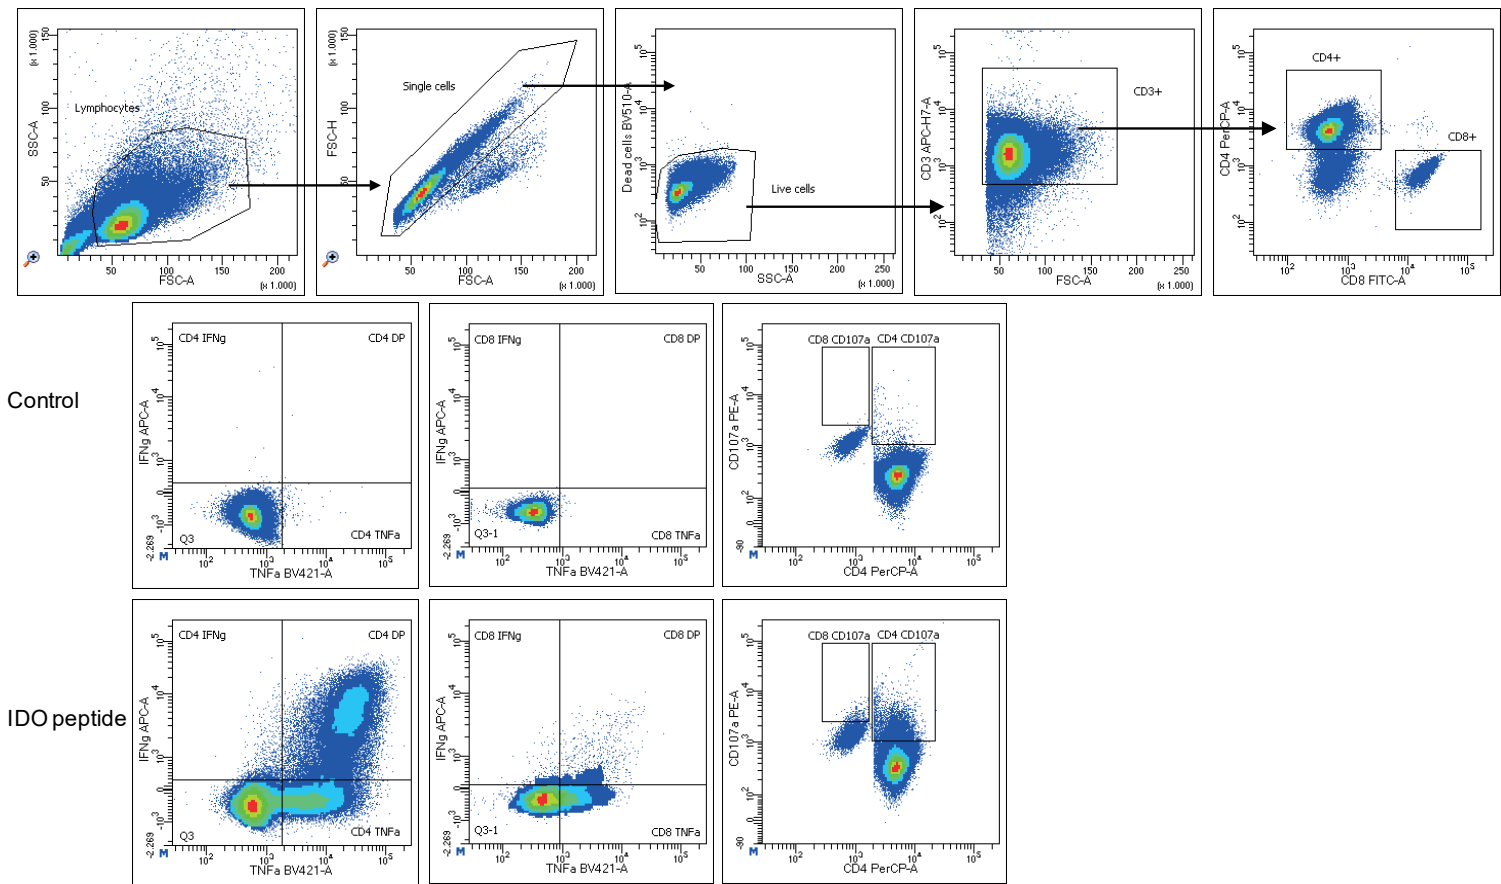

b

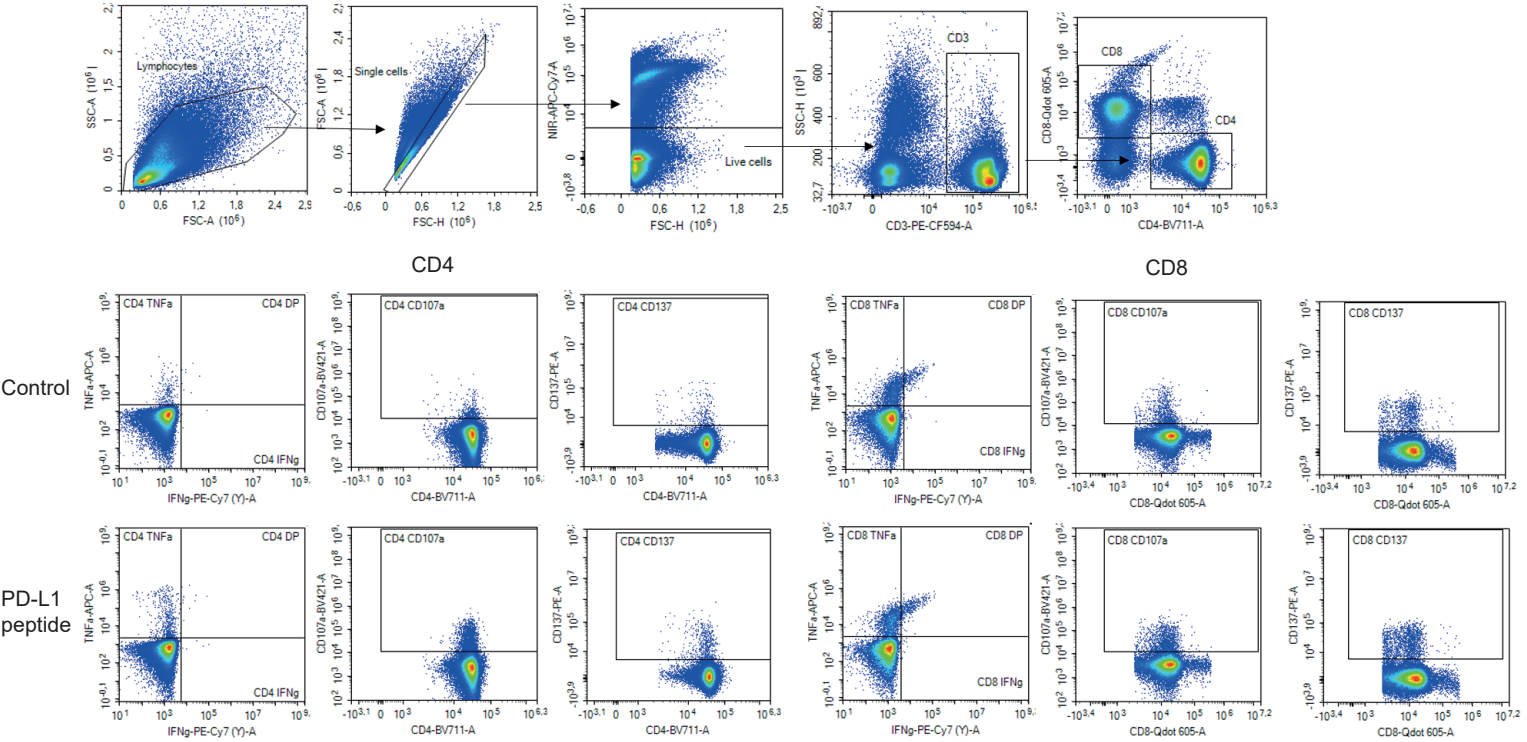

**Supplementary figure 3. Gating strategy.** a) Gating strategy used in cytokine production profile of IDO and PD-L1 specific T cells by intracellular staining. b) Gating strategy used for data presented in Extended Figure 8 for assessment of IDO and PD-L1 specific T cells by intracellular staining of PBMCs ex vivo.

Supplementary table 1. Doses of vaccines and nivolumab administered and reason to stop treatment plus subsequent therapy (n=30)

| Patient ID | BOR <sup>1</sup> | Number vaccines series | Number nivolumab series (3mg/kg) | Number nivolumab series (6 mg/kg) | Reason stop treatment             | Subsequent therapy                |
|------------|------------------|------------------------|----------------------------------|-----------------------------------|-----------------------------------|-----------------------------------|
| MM1636.01  | CR               | 15                     | 24                               | 5                                 | Grade 3 rash                      |                                   |
| MM1636.02  | PD               | 5                      | 5                                |                                   | Progression                       | Dabrafenib/Trametinib             |
| MM1636.03  | CR               | 15                     | 24                               | 9                                 | Maximum benefit                   |                                   |
| MM1636.04  | PD               | 5                      | 5                                |                                   | Progression                       | Radiotherapy, Temodal             |
| MM1636.05  | CR               | 13                     | 21                               |                                   | Grade 2 pneumonitis               |                                   |
| MM1636.06  | CR               | 15                     | 24                               | 9                                 | Progression                       | Dabrafenib/Trametinib             |
| MM1636.07  | CR               | 8                      | 12                               | 2                                 | Grade 2 pneumonitis               | Reinduction Nivolumab             |
| MM1636.08  | PR               | 11                     | 16                               |                                   | Progression                       | Ipilimumab, Radiotherapy          |
| MM1636.09  | PD               | 5                      | 5                                |                                   | Progression                       |                                   |
| MM1636.10  | PR               | 15                     | 24                               | 7                                 | Progression                       | Encorafenib/Binimetinib           |
| MM1636.11  | PD               | 3                      | 3                                |                                   | Progression                       | Dabrafenib/Trametinib, Ipilimumab |
| MM1636.12  | CR               | 15                     | 24                               | 8                                 | Maximum benefit                   |                                   |
| MM1636.13  | PR               | 15                     | 24                               | 13                                | Reached 2 years of treatment      |                                   |
| MM1636.14  | CR               | 11                     | 16                               |                                   | Grade 2 colitis                   |                                   |
| MM1636.15  | PR               | 15                     | 24                               | 11                                | Reached 2 years of treatment      |                                   |
| MM1636.16  | PR               | 9                      | 12                               |                                   | Progression                       | T cell therapy CT ID: NCT02278887 |
| MM1636.17  | PD               | 6                      | 6                                |                                   | Progression                       |                                   |
| MM1636.18  | CR               | 5                      | 5                                |                                   | Grade 5 toxicity due to nivolumab |                                   |
| MM1636.20  | CR               | 11                     | 18                               | 2                                 | Maximum benefit                   |                                   |
| MM1636.22  | CR               | 15                     | 24                               | 1                                 | Grade 3 arthralgia                |                                   |
| MM1636.23  | CR               | 15                     | 24                               | 3                                 | Maximum benefit                   |                                   |
| MM1636.24  | CR               | 15                     | 24                               |                                   | Maximum benefit                   |                                   |
| MM1636.27  | PR               | 15                     | 24                               | 2                                 | Treatment ongoing                 |                                   |
| MM1636.29  | PR               | 15                     | 24                               | 2                                 | Treatment ongoing                 |                                   |
| MM1636.34  | PD               | 3                      | 3                                |                                   | Progression                       |                                   |
| MM1636.35  | PR               | 21                     | 13                               |                                   | Treatment ongoing                 |                                   |
| MM1636.37  | PR               | 7                      | 8                                |                                   | Progression                       | Encorafenib/Binimetinib           |
| MM1636.38  | CR               | 18                     | 12                               |                                   | Treatment ongoing                 |                                   |
| MM1636.39  | PR               | 16                     | 11                               |                                   | Treatment ongoing                 |                                   |
| MM1636.42  | PR               | 7                      | 6                                |                                   | Treatment ongoing                 |                                   |

<sup>1</sup>BOR = Best Overall Response

**Supplementary table 2. Patient baseline characteristics for all patients (n=30)**

| Patient ID | Gender | Age | Previous treatment  | Metastatic sites at baseline                                 | Sum of target lesions at baseline (mm) | M-stage AJCC 7 <sup>th</sup> edition | M-stage AJCC 8 <sup>th</sup> edition | PD-L1 status (clone 28.8) | BRAF status | LDH at baseline (U/L) |
|------------|--------|-----|---------------------|--------------------------------------------------------------|----------------------------------------|--------------------------------------|--------------------------------------|---------------------------|-------------|-----------------------|
| MM1636.01  | M      | 85  | None                | LN, SC, adrenal glands, peritoneal carcinomatosis, bone      | 33                                     | M1c                                  | M1c(1)                               | <1%                       | Wildtype    | 279                   |
| MM1636.02  | F      | 69  | None                | LN, tumor along iliaca artery, SC                            | 216                                    | M1c                                  | M1c(1)                               | <1%                       | Mutated     | 1510                  |
| MM1636.03  | F      | 79  | None                | Pericardial fat, Lung                                        | 60                                     | M1c                                  | M1c(1)                               | >1%                       | Mutated     | 260                   |
| MM1636.04  | F      | 77  | 1. line Ipilimumab  | LN, Lung                                                     | 62                                     | M1b                                  | M1b(0)                               | <1%                       | Wildtype    | 183                   |
| MM1636.05  | M      | 72  | None                | LN, peritoneal carcinomatosis, pleural carcinomatosis, SC    | 88                                     | M1c                                  | M1c(1)                               | >1%                       | Wildtype    | 324                   |
| MM1636.06  | F      | 67  | Adjuvant Ipilimumab | LN                                                           | 19                                     | M1a                                  | M1a(0)                               | >1%                       | Mutated     | 180                   |
| MM1636.07  | M      | 72  | None                | LN                                                           | 43                                     | M1a                                  | M1a(0)                               | >1%                       | Wildtype    | 134                   |
| MM1636.08  | F      | 76  | 1. line Ipilimumab  | LN, SC, tumor near liver, tumor in pelvis, bone marrow tibia | 191                                    | M1c                                  | M1c(1)                               | <1%                       | Wildtype    | 269                   |
| MM1636.09  | F      | 72  | none                | Lung, liver, adrenal gland                                   | 72                                     | M1c                                  | M1c(0)                               | <1%                       | Wildtype    | 255                   |
| MM1636.10  | M      | 46  | none                | Lung, pleura, adrenal gland                                  | 11                                     | M1c                                  | M1c(0)                               | >1%                       | Mutated     | 132                   |
| MM1636.11  | F      | 67  | none                | LN, SC                                                       | 21                                     | M1a                                  | M1a(0)                               | <1%                       | Mutated     | 187                   |
| MM1636.12  | F      | 77  | none                | LN                                                           | 26                                     | M1a                                  | M1a(0)                               | >1%                       | Mutated     | 251                   |
| MM1636.13  | F      | 59  | none                | LN, SC, Lung, liver, bone                                    | 77                                     | M1c                                  | M1c(1)                               | >1%                       | Wildtype    | 252                   |
| MM1636.14  | M      | 54  | none                | LN, SC, gall bladder, lung                                   | 76                                     | M1c                                  | M1c(0)                               | <1%                       | Mutated     | 192                   |
| MM1636.15  | M      | 80  | none                | LN, liver, rectal                                            | 26                                     | M1c                                  | M1c(1)                               | <1%                       | Wildtype    | 309                   |
| MM1636.16  | M      | 46  | none                | Lung, liver                                                  | 14                                     | M1c                                  | M1c(0)                               | > 1%                      | Mutated     | 203                   |
| MM1636.17  | M      | 77  | none                | Lung, SC                                                     | 12                                     | M1b                                  | M1b(0)                               | > 1%                      | Wildtype    | 190                   |
| MM1636.18  | F      | 80  | none                | Lung, SC                                                     | 23                                     | M1b                                  | M1b(0)                               | < 1%                      | Wildtype    | 164                   |
| MM1636.20  | M      | 56  | none                | LN, liver                                                    | 44                                     | M1c                                  | M1c(0)                               | < 1%                      | Mutated     | 145                   |
| MM1636.22  | M      | 76  | none                | LN, Lung                                                     | 73                                     | M1b                                  | M1b(0)                               | >1%                       | Wildtype    | 178                   |
| MM1636.23  | F      | 76  | none                | LN, pleura, spleen                                           | 47                                     | M1c                                  | M1c(0)                               | <1%                       | Wildtype    | 173                   |
| MM1636.24  | F      | 67  | none                | adrenal gland                                                | 31                                     | M1c                                  | M1c(0)                               | >1%                       | Wildtype    | 168                   |
| MM1636.27  | M      | 82  | none                | SC, intramuscular, liver, LN                                 | 55                                     | M1c                                  | M1c(0)                               | >1%                       | Mutated     | 236                   |
| MM1636.29  | M      | 74  | none                | LN, Lung, SC                                                 | 13                                     | M1b                                  | M1b(0)                               | > 1%                      | Wildtype    | 165                   |
| MM1636.34  | M      | 75  | none                | LN, Lung, liver                                              | 41                                     | M1c                                  | M1c(1)                               | < 1%                      | Wildtype    | 314                   |
| MM1636.35  | M      | 52  | none                | lung, liver, SC                                              | 15                                     | M1c                                  | M1c(1)                               | > 1%                      | Wildtype    | 206                   |
| MM1636.37  | F      | 76  | none                | LN                                                           | 42                                     | M1a                                  | M1a(0)                               | <1%                       | Mutated     | 232                   |
| MM1636.38  | F      | 53  | none                | SC                                                           | 25                                     | M1a                                  | M1a(1)                               | >1%                       | Wildtype    | 270                   |
| MM1636.39  | M      | 80  | none                | lung                                                         | 34                                     | M1b                                  | M1b(0)                               | >1%                       | Wildtype    | 180                   |
| MM1636.42  | M      | 81  | none                | liver, SC                                                    | 144                                    | M1c                                  | M1c(1)                               | >1%                       | Wildtype    | 317                   |

**Supplementary table 3. Investigator vs independent central response review (n=30)**

| <b>Patient ID</b> | <b>Investigator review</b> | <b>Independent central review</b> | <b>Explanation of inconsistencies between RECIST 1.1 response evaluation</b>                                                                                                                                                                                                                                                                                                                                                                                                                                                                            |
|-------------------|----------------------------|-----------------------------------|---------------------------------------------------------------------------------------------------------------------------------------------------------------------------------------------------------------------------------------------------------------------------------------------------------------------------------------------------------------------------------------------------------------------------------------------------------------------------------------------------------------------------------------------------------|
| MM1636.01         | CR                         | CR                                |                                                                                                                                                                                                                                                                                                                                                                                                                                                                                                                                                         |
| MM1636.02         | PD                         | PD                                |                                                                                                                                                                                                                                                                                                                                                                                                                                                                                                                                                         |
| MM1636.03         | CR                         | CR                                |                                                                                                                                                                                                                                                                                                                                                                                                                                                                                                                                                         |
| MM1636.04         | PD                         | PD                                |                                                                                                                                                                                                                                                                                                                                                                                                                                                                                                                                                         |
| MM1636.05         | CR                         | CR                                |                                                                                                                                                                                                                                                                                                                                                                                                                                                                                                                                                         |
| MM1636.06         | CR                         | CR                                |                                                                                                                                                                                                                                                                                                                                                                                                                                                                                                                                                         |
| MM1636.07         | CR                         | PR                                | Baseline PET/CT with two mediastinal lymph nodes as target lesions and no non-target lesions. Investigator asses CR due to normalization of both glands and no FDG uptake. Independent reviewer asses PR due to measurable lymph nodes of respectively 11 mm and 11 mm on same scan.                                                                                                                                                                                                                                                                    |
| MM1636.08         | PR                         | PR                                |                                                                                                                                                                                                                                                                                                                                                                                                                                                                                                                                                         |
| MM1636.09         | PD                         | PD                                |                                                                                                                                                                                                                                                                                                                                                                                                                                                                                                                                                         |
| MM1636.10         | PR                         | CR                                | Baseline PET/CT with one target lesion in the lung (16 mm) and non-target lung lesions. Investigator asses PR due to still visible non-target lesions but the target lesion is gone. Independent central reviewer asses CR due to target lesion 0 mm and considers non-target lesions to be non-malignant.                                                                                                                                                                                                                                              |
| MM1636.11         | PD                         | PD                                |                                                                                                                                                                                                                                                                                                                                                                                                                                                                                                                                                         |
| MM1636.12         | CR                         | CR                                |                                                                                                                                                                                                                                                                                                                                                                                                                                                                                                                                                         |
| MM1636.13         | PR                         | CR                                | Baseline PET/CT with three target lesions: two mediastinal lymph nodes (41 mm and 26 mm) and a liver metastasis (9 mm) and non-target lesions (lymph nodes). All non-target lesions are gone, and the two lymph node target lesions have normalized and the liver metastases is 3 mm. Investigator asses PR due to FDG uptake in one of the mediastinal lymph nodes and it keeps decreasing in size. Independent reviewer asses as CR due to CT normalization of lymph nodes and asses liver metastases of 3 mm to be non-malignant with no FDG uptake. |

|           |    |    |                                                                                                                                                                                                                                                                                                                                                                                                                                                                |
|-----------|----|----|----------------------------------------------------------------------------------------------------------------------------------------------------------------------------------------------------------------------------------------------------------------------------------------------------------------------------------------------------------------------------------------------------------------------------------------------------------------|
| MM1636.14 | CR | CR |                                                                                                                                                                                                                                                                                                                                                                                                                                                                |
| MM1636.15 | PR | CR | Baseline PET/CT with two liver target lesions (11 mm and 12 mm) and non-target lesions consisting of other liver metastases and lymph nodes in the mesorectal fat. All target lesions are 0 and all non-target liver metastases are gone. Investigator asses PR due to continued FDG uptake in a normalized mesorectal lymph node. Independent central review asses CR due to CT normalization of non-target lymph nodes and no liver metastases.              |
| MM1636.16 | PR | SD | Investigator measures baseline PET/CT target lesion in liver to be 14 mm while independent central review measures it to be 12 mm. No non-target lesions. Investigator review measures lesion to 9 mm while independent central review measure it to 11 mm and therefore asses PR vs SD.                                                                                                                                                                       |
| MM1636.17 | PD | PD |                                                                                                                                                                                                                                                                                                                                                                                                                                                                |
| MM1636.18 | CR | CR |                                                                                                                                                                                                                                                                                                                                                                                                                                                                |
| MM1636.20 | CR | CR |                                                                                                                                                                                                                                                                                                                                                                                                                                                                |
| MM1636.22 | CR | CR |                                                                                                                                                                                                                                                                                                                                                                                                                                                                |
| MM1636.23 | CR | CR |                                                                                                                                                                                                                                                                                                                                                                                                                                                                |
| MM1636.24 | CR | CR |                                                                                                                                                                                                                                                                                                                                                                                                                                                                |
| MM1636.27 | PR | PR |                                                                                                                                                                                                                                                                                                                                                                                                                                                                |
| MM1636.29 | PR | CR | Baseline PET/CT with one target lesion in right lung (13 mm) and no non-target lesions. At baseline cutaneous metastases on left crus, biopsy verified but not detectable on PET/CT scan. Investigator asses best decrease in target a to be 10 mm and a biopsy from cutaneous metastases on crus is without malignancy. Is therefore assessed to be PR. Independent reviewer asses target lesion to decrease to 0 mm and therefore asses patient to be in CR. |
| MM1636.34 | PD | PD |                                                                                                                                                                                                                                                                                                                                                                                                                                                                |
| MM1636.35 | PR | PR |                                                                                                                                                                                                                                                                                                                                                                                                                                                                |
| MM1636.37 | PR | PR |                                                                                                                                                                                                                                                                                                                                                                                                                                                                |
| MM1636.38 | CR | CR |                                                                                                                                                                                                                                                                                                                                                                                                                                                                |
| MM1636.39 | PR | PR |                                                                                                                                                                                                                                                                                                                                                                                                                                                                |
| MM1636.42 | PR | PR |                                                                                                                                                                                                                                                                                                                                                                                                                                                                |



| <b>Supplementary table 4. Treatment related adverse events (n=30)</b> |           |     |           |    |
|-----------------------------------------------------------------------|-----------|-----|-----------|----|
|                                                                       | Grade 1-2 |     | Grade 3-4 |    |
| <b>Skin</b>                                                           |           |     |           |    |
| Rash                                                                  | 14        | 47% | 1         | 3% |
| Dry skin                                                              | 6         | 20% |           |    |
| Pruritus                                                              | 6         | 20% |           |    |
| Vitiligo                                                              | 4         | 13% |           |    |
| Vasculitus                                                            |           | 3%  |           |    |
| <b>Gastrointestinal</b>                                               |           |     |           |    |
| Diarrhoea                                                             | 7         | 23% | 1         | 3% |
| Constipation                                                          | 1         | 3%  |           |    |
| Abdominal pain                                                        | 1         | 3%  |           |    |
| Colitis                                                               | 1         | 3%  | 1         | 3% |
| <b>Respiratory</b>                                                    |           |     |           |    |
| Pneumonitis                                                           | 3         | 10% |           |    |
| Pleural effusion                                                      | 1         | 3%  |           |    |
| Dyspnea                                                               | 4         | 13% |           |    |
| <b>Endocrinic</b>                                                     |           |     |           |    |
| Adrenal insufficiency                                                 | 2         | 7%  | 1         | 3% |
| Hypophysitis                                                          | 2         | 7%  |           |    |
| hypothyroidisme                                                       | 1         | 3%  |           |    |
| Hyperthyrodisme                                                       | 2         | 7%  |           |    |
| <b>Musculoskeletal</b>                                                |           |     |           |    |
| Arthralgia                                                            | 9         | 30% | 2         | 7% |
| Myalgia                                                               | 5         | 17% |           |    |
| <b>Laboratory tests</b>                                               |           |     |           |    |
| Increased amylase                                                     | 6         | 20% |           |    |
| Increase ALAT                                                         | 3         | 10% |           |    |
| Hyponatremia                                                          |           |     | 1         | 3% |
| <b>Infusion reaction</b>                                              |           |     |           |    |
| <b>Other</b>                                                          |           |     |           |    |
| Nausea                                                                | 7         | 23% |           |    |
| Pruritus                                                              | 6         | 20% |           |    |
| Xerostomia                                                            | 5         | 17% |           |    |
| Stomatitis                                                            | 2         | 7%  |           |    |
| Nasal congestion                                                      | 2         | 7%  |           |    |
| Periorbital oedema                                                    | 1         | 3%  |           |    |
| Dry eyes                                                              | 1         | 3%  |           |    |
| Peripheral neuropathy                                                 | 1         | 3%  |           |    |
| Hearing imparied                                                      | 1         | 3%  |           |    |
| <b>Vaccine related</b>                                                |           |     |           |    |
| Injection site reaction                                               | 23        | 77% |           |    |
| Granuloma at injection site                                           | 19        | 63% |           |    |
| Redness at injection site                                             | 6         | 20% |           |    |
| Pain at injection site                                                | 4         | 13% |           |    |
| Pruritus at injection site                                            | 4         | 13% |           |    |
| Myalgia at injection site                                             | 1         | 3%  |           |    |

**Supplementary table 5. HLA type (n=30)**

| <b>Patient ID</b> | <b>HLA-A</b> | <b>HLA-B</b> | <b>HLA-C</b> | <b>HLA-DRB1</b> | <b>HLA-DQA1</b> | <b>HLA-DPA1</b> | <b>HLA-DQB1</b> |
|-------------------|--------------|--------------|--------------|-----------------|-----------------|-----------------|-----------------|
| <b>MM1636.01</b>  | A01 A25      | B08 B18      | C07 C12      | 03 15           | 01 05           | 01 01           | 02 06           |
| <b>MM1636.02</b>  | A01 A03      | B27 B44      | C02 C05      | 04 11           | 03 05           | 01 01           | 03 03           |
| <b>MM1636.03</b>  | A01 A02      | B08 B40      | C03 C07      | 03 13           | 01 05           | 01 02           | 02 06           |
| <b>MM1636.04</b>  | A03 A25      | B07 B18      | C07 C12      | 04 15           | 01 03           | 01 02           | 03 06           |
| <b>MM1636.05</b>  | A01 A03      | B08 B49      | C07 C07      | 03 13           | 01 05           | 02 02           | 02 06           |
| <b>MM1636.06</b>  | A02 A68      | B15 B37      | C03 C06      | 01 13           | 01 01           | 01 02           | 05 06           |
| <b>MM1636.07</b>  | A23 A31      | B07 B44      | C04 C07      | 11 15           | 01 05           | 01 01           | 03 06           |
| <b>MM1636.08</b>  | A02 A26      | B35 B51      | C04 C05      | 11 13           | 01 05           | 01 01           | 03 06           |
| <b>MM1636.09</b>  | A02 A32      | B15 B44      | C03 C05      | 04 11           | 03 05           | 01 01           | 03 03           |
| <b>MM1636.10</b>  | A03 A24      | B07 B51      | C07 C15      | 15 16           | 01 01           | 01 02           | 05 06           |
| <b>MM1636.11</b>  | A02 A25      | B18 B27      | C02 C12      | 04 15           | 01 03           | 01 01           | 03 06           |
| <b>MM1636.12</b>  | A03 A66      | B15 B37      | C03 C06      | 04 10           | 01 03           | 01 01           | 03 05           |
| <b>MM1636.13</b>  | A01 A02      | B08 B40      | C03 C07      | 04 13           | 01 03           | 01 01           | 03 06           |
| <b>MM1636.14</b>  | A02 A03      | B07 B51      | C01 C07      | 01 11           | 01 05           | 01 01           | 03 05           |
| <b>MM1636.15</b>  | A24 A32      | B40 B44      | C03 C05      | 04 11           | 03 05           | 01 01           | 03 03           |
| <b>MM1636.16</b>  | A03 A31      | B07 B27      | C02 C07      | 04 12           | 03 05           | 01 01           | 03 03           |
| <b>MM1636.17</b>  | A02 A30      | B14 B27      | C02 C08      | 01 11           | 01 05           | 01 01           | 03 05           |
| <b>MM1636.18</b>  | A02 A02      | B27 B40      | C01 C03      | 01 13           | 01 01           | 01 01           | 05 06           |
| <b>MM1636.20</b>  | A24 A24      | B35 B44      | C04 C16      | 07 08           | 02 04           | 01 02           | 02 04           |
| <b>MM1636.22</b>  | A01 A02      | B07 B49      | C07 C07      | 08 15           | 01 04           | 01 01           | 04 06           |
| <b>MM1636.23</b>  | A03 A03      | B07 B07      | C07 C07      | 01 15           | 01 01           | 01 01           | 05 06           |
| <b>MM1636.24</b>  | A02 A02      | B15 B44      | C04 C05      | 01 04           | 01 03           | 01 01           | 03 05           |
| <b>MM1636.27</b>  | A02 A02      | B40 B41      | C03 C17      | 04 15           | 01 03           | 01 01           | 03 06           |
| <b>MM1636.29</b>  | A01 A11      | B07 B08      | C07 C07      | 04 04           | 03 03           | 01 01           | 03 03           |
| <b>MM1636.34</b>  | A01 A11      | B08 B35      | C04 C07      | 03 11           | 05 05           | 01 02           | 02 03           |
| <b>MM1636.35</b>  | A02 A02      | B15 B40      | C01 C03      | 11 12           | 05 05           | 01 01           | 03 03           |
| <b>MM1636.37</b>  | A01 A24      | B35 B37      | C04 C06      | 11 15           | 01 05           | 01 02           | 03 06           |
| <b>MM1636.38</b>  | A01 A24      | B35 B57      | C04 C06      | 07 14           | 01 02           | 01 02           | 02 05           |
| <b>MM1636.39</b>  | A02 A24      | B15 B15      | C03 C03      | 04 15           | 01 03           | 01 01           | 03 06           |
| <b>MM1636.42</b>  | A01 A02      | B07 B07      | C07 C07      | 15 15           | 01 01           | 01 01           | 06 06           |

| <b>Supplementary table 6. Overview of DTH injections and Skin infiltrating T cells grown</b> |                        |                             |                                     |                                   |
|----------------------------------------------------------------------------------------------|------------------------|-----------------------------|-------------------------------------|-----------------------------------|
| <b>Patient ID</b>                                                                            | <b>DTH injections</b>  | <b>SKILS grown from mix</b> | <b>SKILS grown from PD-L1 alone</b> | <b>SKILS grown from IDO alone</b> |
| MM1636.01                                                                                    | mix of PD-L1/IDO * 3   | yes                         | NA                                  | NA                                |
| MM1636.03                                                                                    | mix of PD-L1/IDO * 3   | yes                         | NA                                  | NA                                |
| MM1636.04                                                                                    | mix of PD-L1/IDO * 3   | yes                         | NA                                  | NA                                |
| MM1636.05                                                                                    | mix of PD-L1/IDO * 3   | no                          | NA                                  | NA                                |
| MM1636.06                                                                                    | mix of PD-L1/IDO * 3   | yes                         | NA                                  | NA                                |
|                                                                                              | PD-L1 alone, IDO alone |                             |                                     |                                   |
| MM1636.08                                                                                    | and mix of PD-L1/IDO   | no                          | NA                                  | NA                                |
|                                                                                              | PD-L1 alone, IDO alone |                             |                                     |                                   |
| MM1636.10                                                                                    | and mix of PD-L1/IDO   | yes                         | yes                                 | yes                               |
|                                                                                              | PD-L1 alone, IDO alone |                             |                                     |                                   |
| MM1636.14                                                                                    | and mix of PD-L1/IDO   | yes                         | yes                                 | no                                |
|                                                                                              | PD-L1 alone, IDO alone |                             |                                     |                                   |
| MM1636.15                                                                                    | and mix of PD-L1/IDO   | yes                         | yes                                 | yes                               |
|                                                                                              | PD-L1 alone, IDO alone |                             |                                     |                                   |
| MM1636.16                                                                                    | and mix of PD-L1/IDO   | yes                         | yes                                 | no                                |
|                                                                                              | PD-L1 alone, IDO alone |                             |                                     |                                   |
| MM1636.20                                                                                    | and mix of PD-L1/IDO   | yes                         | yes                                 | no                                |
|                                                                                              | PD-L1 alone, IDO alone |                             |                                     |                                   |
| MM1636.22                                                                                    | and mix of PD-L1/IDO   | yes                         | yes                                 | no                                |
|                                                                                              | PD-L1 alone, IDO alone |                             |                                     |                                   |
| MM1636.23                                                                                    | and mix of PD-L1/IDO   | yes                         | yes                                 | no                                |
|                                                                                              | PD-L1 alone, IDO alone |                             |                                     |                                   |
| MM1636.24                                                                                    | and mix of PD-L1/IDO   | yes                         | yes                                 | no                                |
|                                                                                              | PD-L1 alone, IDO alone |                             |                                     |                                   |
| MM1636.27                                                                                    | and mix of PD-L1/IDO   | yes                         | no                                  | yes                               |
